# Supplementary material for: Water availability as an agent of selection in introduced populations of Arabidopsis thaliana: impacts on flowering time evolution
Source: PubMed Central journal article supplement (PMC4406364; doi:10.7717/peerj.898), 2015-04-16

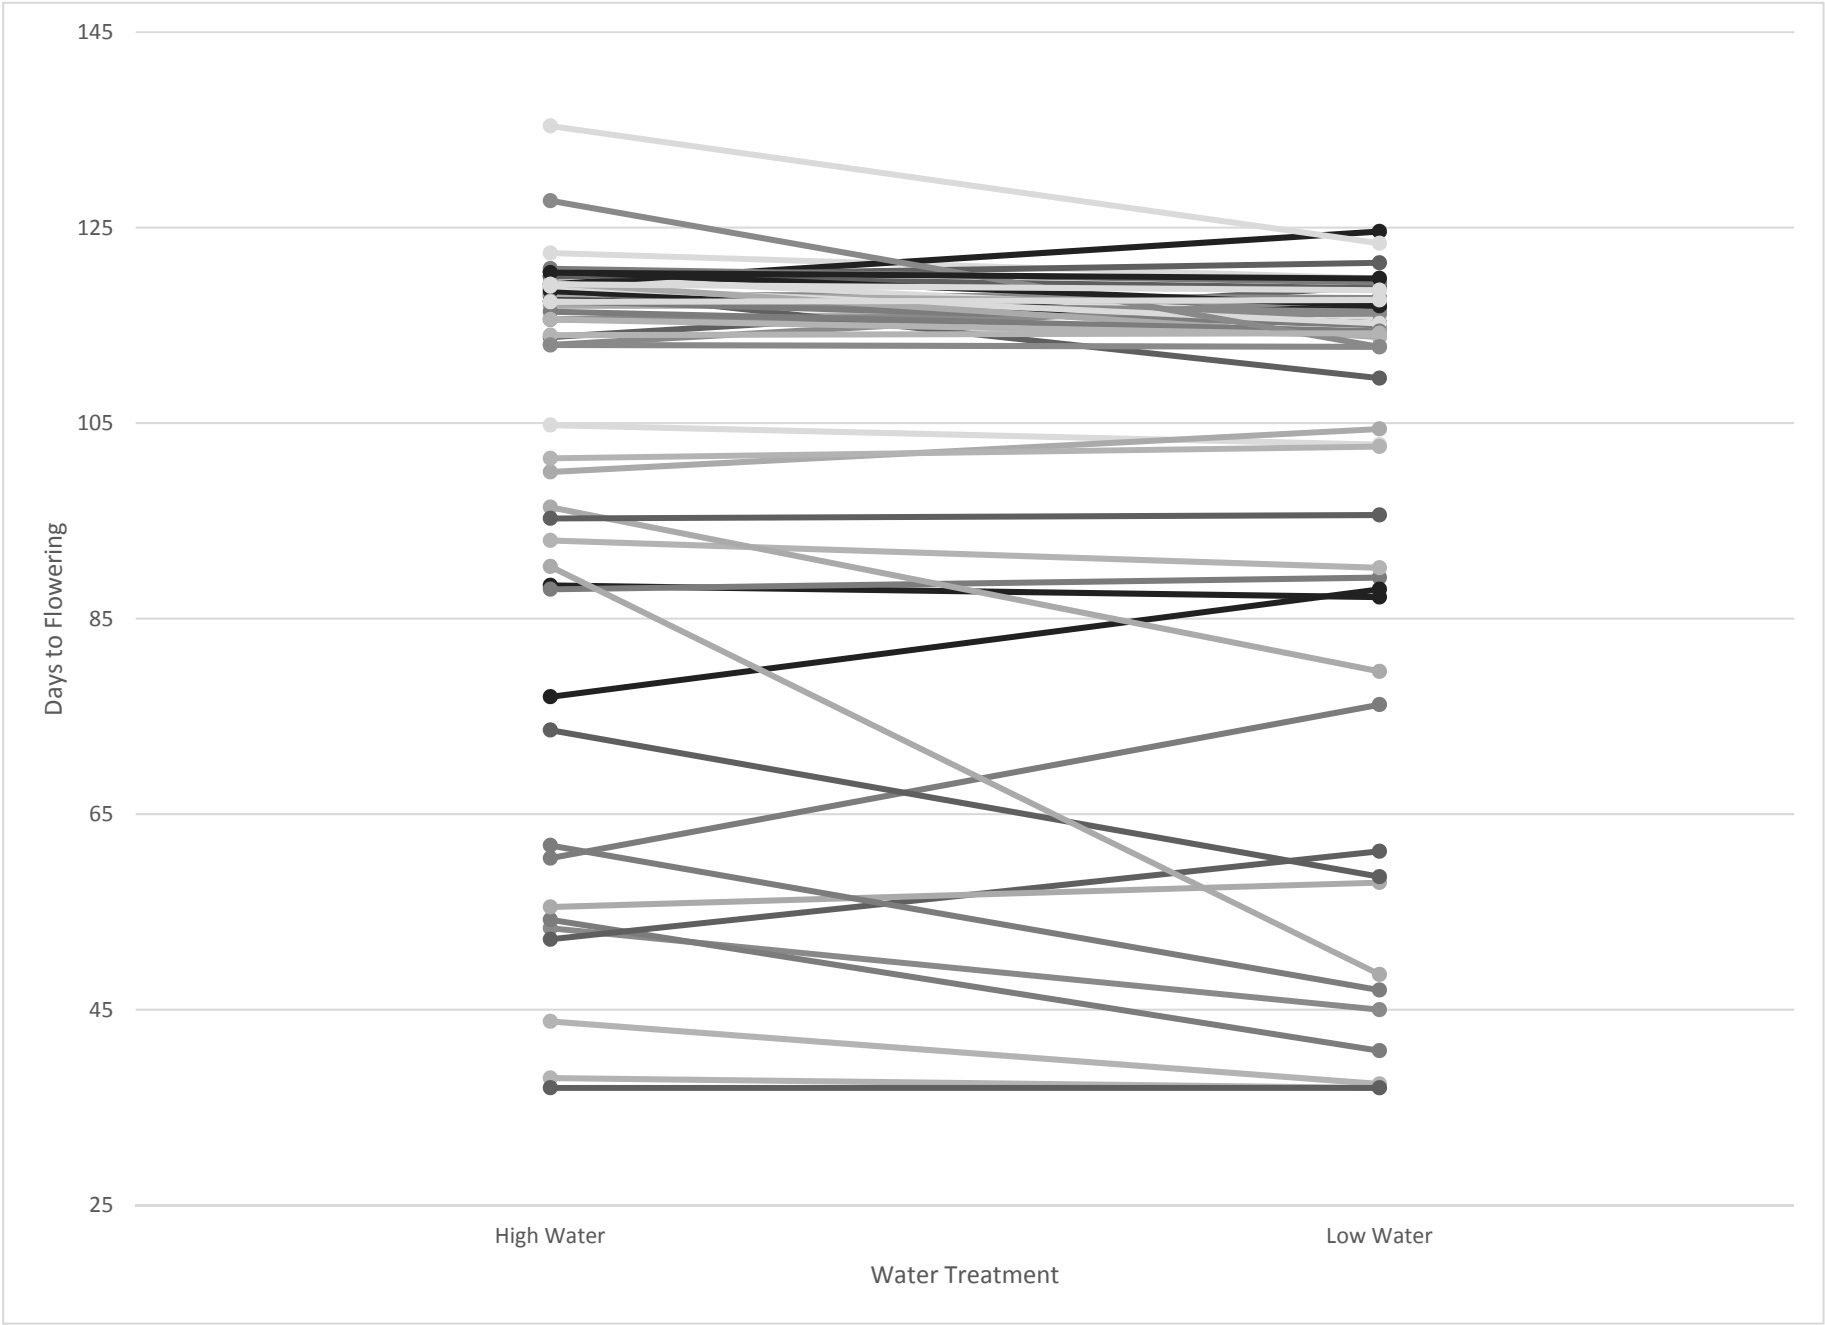

Supplement: peerj-03-898-s002.pdf [file peerj-03-898-s002.pdf]
